# Supplementary material for: Cervical Squamous Cell Carcinoma Diagnosis by FTIR Microspectroscopy
Source: MDPI journal article supplement (doi:10.3390/molecules29050922), 2024-02-20
Supplement: s1 [file s1]

# Cervical Squamous Cell Carcinoma Diagnosis by FTIR Microspectroscopy

Maria M. Félix <sup>1</sup>, Mariana V. Tavares <sup>1,2</sup>, Inês P. Santos <sup>1</sup>, Ana L. M. Batista de Carvalho <sup>1</sup>,  
Luís A. E. Batista de Carvalho <sup>1,\*</sup> and Maria Paula M. Marques <sup>1,3</sup>

<sup>1</sup> Molecular Physical-Chemistry R&D Unit, Department of Chemistry, University of Coimbra, 3004-535 Coimbra, Portugal; mmfelix@uc.pt (M.M.F.); mariana.vide.tavares@ipoporto.min-saude.pt (M.V.T.); ips@uc.pt (I.P.S.); pmc@ci.uc.pt (M.P.M.M.)

<sup>2</sup> Gynaecology Department, Portuguese Oncology Institute of Porto, 4200-072 Porto, Portugal

<sup>3</sup> Department of Life Sciences, Faculty of Science and Technology, University of Coimbra, 3000-456 Coimbra, Portugal

\* Correspondence: labc@ci.uc.pt; Tel.: +351-239-854-462

## Supplementary Information

### TABLE OF CONTENTS

#### 1. Figures

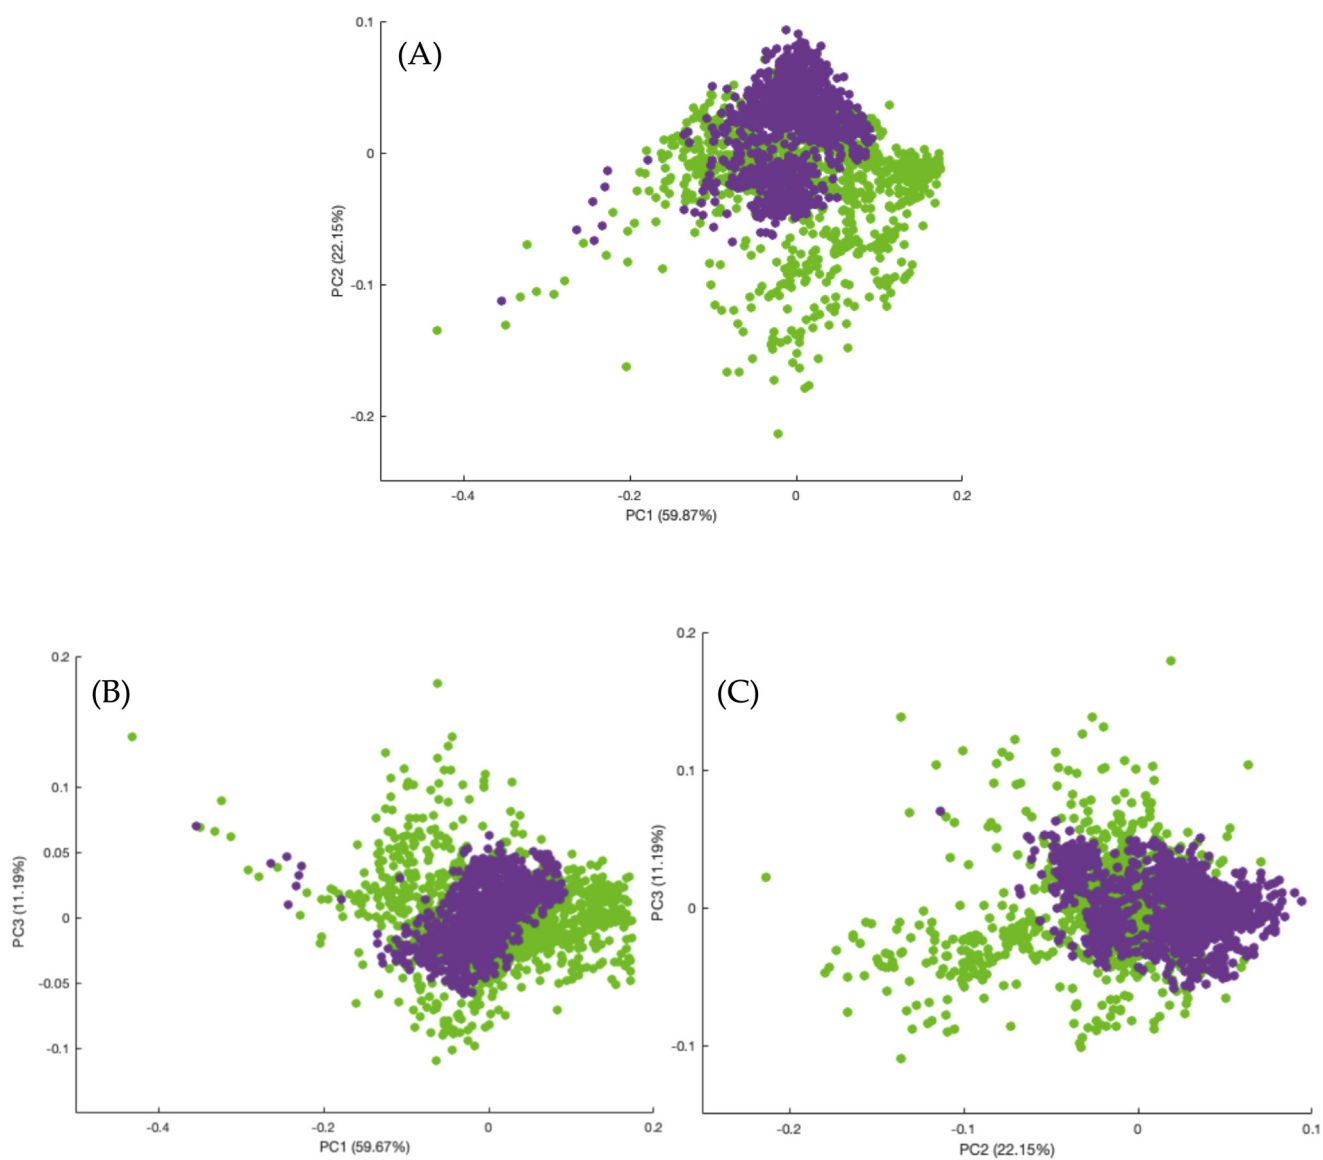

**Figure S1.** Principal Component Analysis score of FTIR data for cryopreserved normal vs. SCC cervical tissues; **(A)** PC1 vs. PC2; **(B)** PC1 vs. PC3 and **(C)** PC2 vs. PC3
